# Supplementary material for: Intrafibrillar calcium carbonate mineralization of electrospinning polyvinyl alcohol/collagen films with improved mechanical and bioactive properties
Source: Royal Society of Chemistry journal article supplement (doi:10.1039/d4tb01472c), 2024-10-31
Supplement: d4tb01472c1.pdf [file d4tb01472c1.pdf]

## *Supplementary Material*

# Intrafibrillar Calcium Carbonate Mineralization of Electrospinning Polyvinyl Alcohol/Collagen Films with Improved Mechanical and Bioactive Properties

*Yin Liu*, <sup>a, b, ‡</sup>*Xin Gao*, <sup>c, e, ‡</sup>*Yuqi Li*, <sup>c</sup>*Anqi Gao*, <sup>b</sup>*Zhuozhi Zheng*, <sup>b</sup>*Jingjiang Wei*, <sup>a, d</sup>*Hongye Yang*, <sup>e</sup>  
*Hang Ping*, <sup>a, b, \*</sup>*Hao Xie*, <sup>f</sup>*Hao Wang*, <sup>b</sup>*Weimin Wang*, <sup>b</sup>*Zhengyi Fu*, <sup>a, b, \*</sup>

<sup>a</sup> Hubei Longzhong Laboratory, Wuhan University of Technology Xiangyang Demonstration Zone, Xiangyang, 441000, China

<sup>b</sup> State Key Laboratory of Advanced Technology for Materials Synthesis and Processing, Wuhan University of Technology, Wuhan, 430070, China

<sup>c</sup> Central Laboratory, Peking University School and Hospital of Stomatology & National Center for Stomatology & National Clinical Research Center for Oral Diseases & National Engineering Research Center of Oral Biomaterials and Digital Medical Devices, No.22, Zhongguancun South Avenue, Haidian District, Beijing, 100081, PR China.

<sup>d</sup> Institute for Advanced Study, Chengdu University, Chengdu, 610106, China

<sup>e</sup> State Key Laboratory of Oral & Maxillofacial Reconstruction and Regeneration, Key Laboratory of Oral Biomedicine Ministry of Education, Hubei Key Laboratory of Stomatology, School & Hospital of Stomatology, Wuhan University, Wuhan 430070, China

<sup>f</sup> School of Chemistry, Chemical Engineering, and Life Science, Wuhan University of Technology, Wuhan, 430070, China.

\*Corresponding authors Email addresses: [hping@whut.edu.cn](mailto:hping@whut.edu.cn); [zyfu@whut.edu.cn](mailto:zyfu@whut.edu.cn)

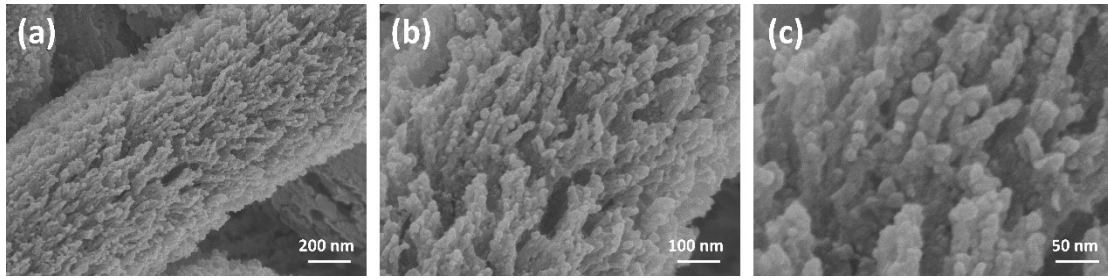

**Figure S1.** SEM image of intrafibrillar mineralization of PVA/Col-CaCO<sub>3</sub> with higher magnifications.

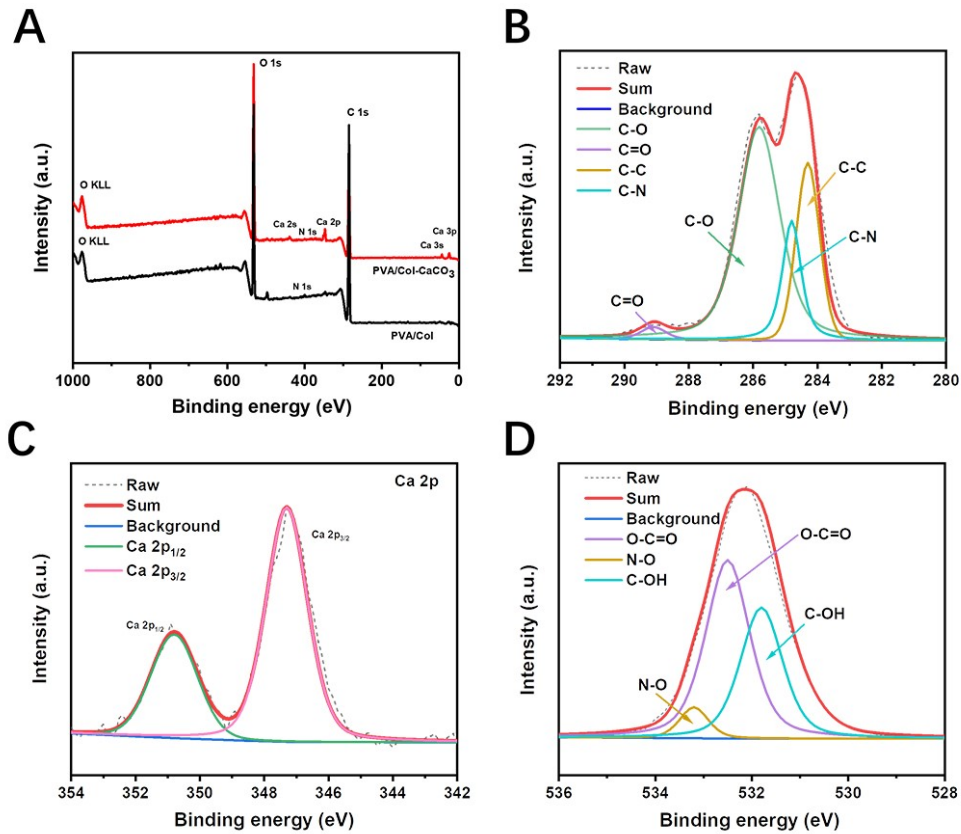

**Figure S2.** XPS spectra of PVA/Col and PVA/Col-CaCO<sub>3</sub>. (A) Full spectrum, (B-D) high resolution deconvoluted spectra of C 1s, Ca 2p and O 1s, respectively.

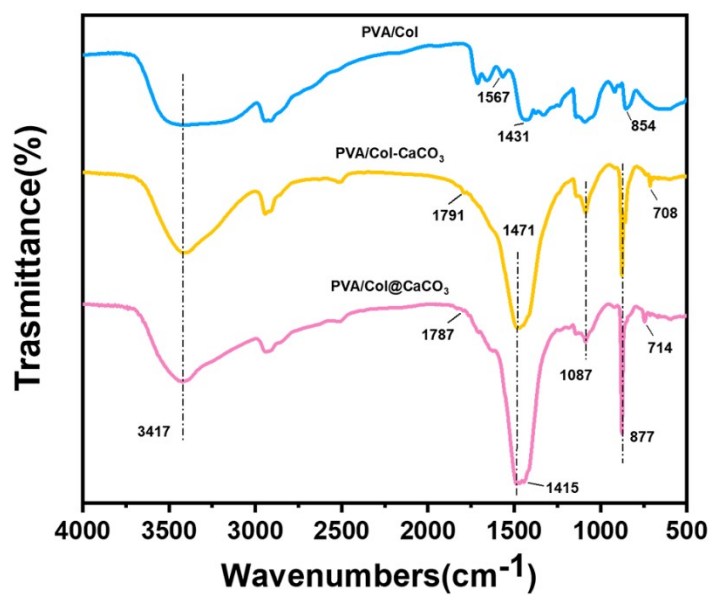

Figure S3. FTIR spectra of PVA/Col, PVA/Col-CaCO<sub>3</sub> and PVA/Col@CaCO<sub>3</sub>.

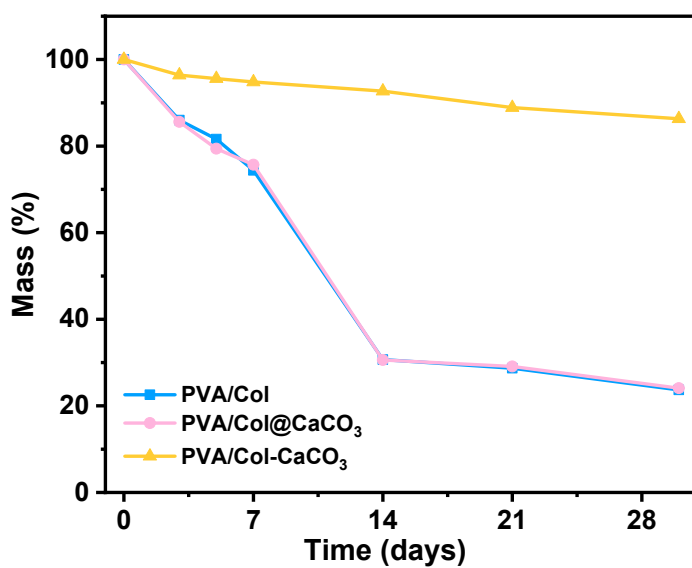

Figure S4. Degradation profile of the PVA/Col, PVA/Col@CaCO<sub>3</sub> and PVA/Col-CaCO<sub>3</sub> in PBS containing collagenase.

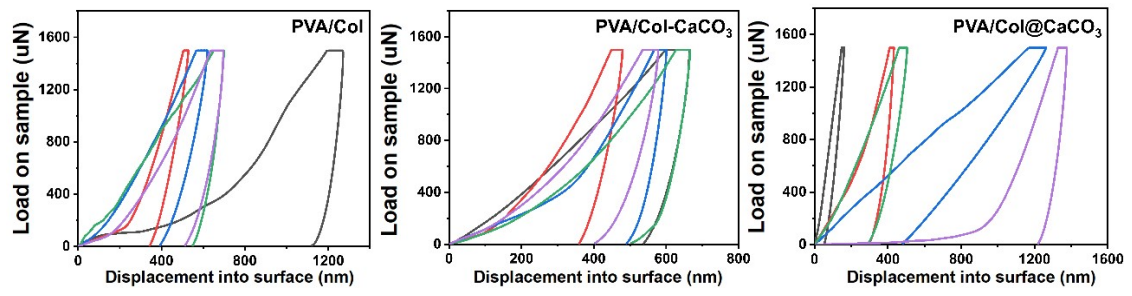

**Figure S5.** Mechanical properties of PVA/Col, PVA/Col-CaCO<sub>3</sub> and PVA/Col@CaCO<sub>3</sub> tested via nanoindentation tests. Different colors of the curves represent different test points from the sample within the same area.

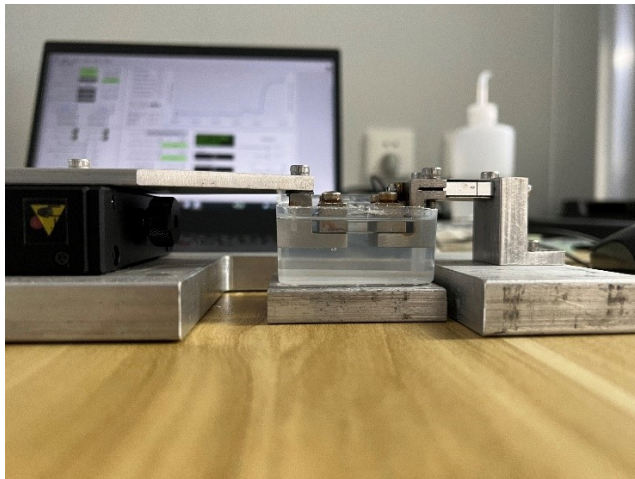

**Figure S6.** A self-designed mechanical testing setup.

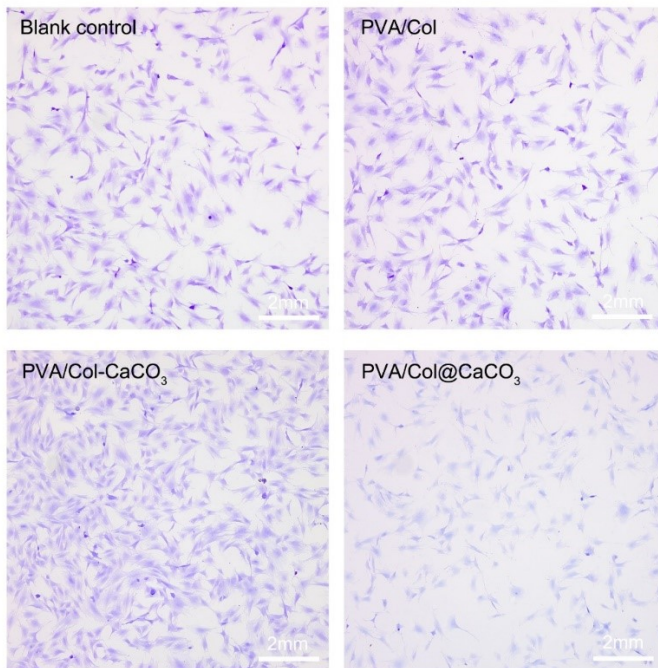

**Figure S7.** Crystal violet staining of BMSCs cultured with various samples for 1 day.

**Table S1.** Mechanical properties of bioactive-films in previous work.

| <b>Number</b> | <b>Sample</b>              | <b>Hardness</b>  | <b>Ref.</b> |
|---------------|----------------------------|------------------|-------------|
| 1             | PVA/HA                     | 20 kPa~200 kPa   | [1]         |
| 2             | Coll_pNE_Ca                | 37.6 MPa         | [2]         |
| 3             | PVA-COL scaffolds          | 3.581 MPa        | [3]         |
| 4             | Aligned collagen scaffolds | 31.02 ± 3.22 MPa | [4]         |
| 5             | PCL/COL scaffolds          | 16.3 MPa         | [5]         |
| 6             | PVA/Col-CaCO <sub>3</sub>  | 211.6 ± 0.06 MPa | This work   |

## Reference

- [1] S.H. Oh, D.B. An, T.H. Kim, J.H. Lee, *Acta Biomater.* 2016;35:23-31.
- [2] C. Dhand, S.T. Ong, N. Dwivedi, et al., *Biomaterials.* 2016;104:323-338.
- [3] Z. Wu, B. Kong, R. Liu, W. Sun, S. Mi, *Nanomaterials.* 2018;8(2):124.
- [4] Y. Wang, M. Yao, J. Zhou, et al., *Biomaterials.* 2011;32:6737-6744.
- [5] V. Beachley, R.G. Hepfer, E. Katsanevakis, N. Zhang, X. Wen., *Bioengineering.* 2014;1:114-133.
